1 EICA FAILS AS AN EXPLANATION OF GROWTH AND DEFENCE

2 EVOLUTION FOLLOWING MULTIPLE INTRODUCTIONS

3

4 Lotte A. van Boheemen<sup>1\*</sup>, Sarah Bou-Assi<sup>1</sup>, Akane Uesugi<sup>1</sup>, Kathryn A. Hodgins<sup>1</sup>

5

6 <sup>1</sup>School of Biological Sciences, Monash University, Clayton, VIC 3800, Australia

7

8 \*Corresponding author, [la.vanboheemen@gmail.com](mailto:la.vanboheemen@gmail.com)

9

10 **ABSTRACT**

11 1. Rapid adaptation is aiding invasive populations in their competitive success.

12 The evolution of increased competitive ability (EICA) hypothesis posits this  
13 enhanced performance results from escape from native enemies, yet its support  
14 is equivocal.

15 2. We here test EICA comprehensively by investigating adaptive divergence of  
16 various constitutive and inducible defence-related traits within the native North  
17 America and introduced European and Australian ranges, whilst controlling for  
18 divergence due to latitudinal trait clines, individual resource budgets and  
19 population differentiation using >11,000 SNPs.

20 3. We do not identify a general reduction in defence in concert with an increase in  
21 growth among the multiple introduced ranges as predicted by EICA. Yet, rapid,  
22 repeated clinal adaptation in defence-related traits was apparent despite distinct  
23 demographic histories. Divergence in energy budgets among ranges may  
24 explain some, but not all, defence-related trait divergence.

25 4. *Synthesis*: The rapid spread of invasive species is affected by a multitude of  
26 factors, likely including adaptation to climate and escape from natural enemies.  
27 Unravelling the mechanisms underlying invasives' success enhances  
28 understanding of eco-evolutionary theory and is essential to inform management  
29 strategies in the face of ongoing climate change.

30

31 **KEYWORDS**

32 EICA, latitudinal adaptation, growth-defence trade-offs, constitutive defence,  
33 inducible defence, invasive species, phenolic compounds, resource budgets

34

## 35 INTRODUCTION

36 Biological invasions are occurring at an accelerating pace due to the  
37 globalisation of anthropogenic activity (Ricciardi, 2007). Individuals colonizing new  
38 ranges likely face environments different from those previously experienced (Sax &  
39 Brown, 2000; Allendorf & Lundquist, 2003; Chown et al., 2014). Nonetheless, alien  
40 populations often display enhanced performance compared to their native  
41 counterparts (Blossey & Notzold, 1995; Thébaud & Simberloff, 2001; Parker et al.,  
42 2013), and this can be facilitated by rapid adaptation (Chown et al., 2014; Colautti &  
43 Lau, 2015; Dlugosch et al., 2015). The evolution of increased competitive ability  
44 (EICA) hypothesis posits that invasives' trait divergence results from release from  
45 natural enemies, allowing the allocation of defence resources to growth and  
46 reproduction (Blossey & Notzold, 1995). However, limited empirical support exists  
47 for the predicted evolutionary decrease in invasive plants' herbivory defence in  
48 concert with increased competitive ability (Bossdorf et al., 2005; Felker & Quinn et al.,  
49 2013) and EICA as yet falls short as a general hypothesis to explain invasion success.

50 The complex interplay between the evolutionary mechanisms shaping  
51 phenotypic divergence could confound inferences predicted by EICA. Distinct  
52 demographic processes, including founder effects, genetic drift and admixture, often  
53 characterize introduction and alone can lead to divergence between native and  
54 introduced populations (Lee, 2002; Facon et al., 2006; Prentis et al., 2008; Rius &  
55 Darling, 2014; Estoup et al., 2016). Dissection of the various evolutionary processes  
56 that can contribute to trait divergence is required to advance our understanding of  
57 rapid spread in invasive species. In addition, the repeatability of evolutionary patterns  
58 associated with introductions is unclear as the majority of studies on EICA focus on a  
59 single invaded range (e.g. Blossey & Notzold, 1995; Joshi & Vrieling, 2005; Hodgins

60 & Rieseberg, 2011; Uesugi & Kessler, 2016, but see Colomer & Ventura et al., 2015).  
61 To reveal the general applicability of EICA, tests across multiple introduced ranges  
62 are essential.

63 Biotic and abiotic clines governing plant resistance within ranges (Endara &  
64 Coley, 2011; Moles et al., 2011a) can also obscure the adaptive underpinnings of trait  
65 divergence among ranges experienced during invasion. For instance, herbivore  
66 pressure in the native range is expected to increase towards lower latitudes and  
67 potentially drive clines in plant defence in some species (Moles et al., 2011a). This  
68 clinal pattern may be absent in the introduced range due to overall lack of herbivory,  
69 resulting in non-parallel defence gradients between ranges (e.g. Cronin et al., 2015;  
70 Allen et al., 2017). Moreover, high-resource environments support plant species with  
71 faster growth that are more vulnerable to herbivores (Coley et al., 1985; Zandt, 2007;  
72 Endara & Coley, 2011). Latitudinal clines in resource availability could thus lead to  
73 the evolution of high growth and reduced chemical defences at lower latitudes  
74 (Woods et al., 2012; Moreira et al., 2014), although this interspecific pattern may  
75 have limited application to intraspecific variation (Hahn & Maron, 2016, but see  
76 Woods et al., 2012). Taken together these patterns suggest that the evolutionary  
77 consequences of herbivore escape could change along latitudinal gradients  
78 (Blumenthal, 2006). Geographical clines therefore need to be considered in tests of  
79 adaptive divergence between ranges (Colautti et al., 2009).

80 Herbivore defence may also evolve indirectly if defensive traits are genetically  
81 correlated with other traits that are under strong selection. For example, the growth-  
82 defence trade-off hypothesis (Coley et al., 1985) suggests a negative genetic  
83 correlation between plant growth and defence-related traits, because allocation of  
84 limited resource to one trait necessarily reduces resource available for the other.

85 Nevertheless, empirical demonstrations of such trade-offs are rare (Uesugi et al.,  
86 2017), and may often be obscured by genetic variation in resource acquisition (Van  
87 Noordwijk & de Jong, 1986). High variation in resource acquisition among genotypes  
88 from across the species range, such as elevated resource returns of larger individuals  
89 (Van Noordwijk & de Jong, 1986) or individuals with high specific leaf area (SLA,  
90 Poorter & Remkes, 1990), is expected to mask the underlying trade-offs and result in  
91 a positive correlation between growth and defence (Agrawal, 2011; Züst & Agrawal,  
92 2017). To test for the evolution of defence traits driven by allocation trade-offs, we  
93 thus need to assess how potential traits governing resource acquisition could impede  
94 detection of allocation trade-offs between growth and defence.

95         The frequency and level of attack could lead to various defence responses  
96 (Orrock et al., 2015; Bixenmann et al., 2016), expected to trade off due to their costs  
97 and redundancy (Koricheva et al., 2004; Agrawal et al., 2010). Predictable and strong  
98 attack should favour constitutive defence, whereas low, infrequent herbivory would  
99 render no, or an inducible response (Agrawal & Karban, 1999; Ito & Sakai, 2009).  
100 These responses have been shown to vary over latitudinal clines within ranges  
101 (Moreira et al., 2014 Rasmann & Agrawal, 2011). However, the studies exploring  
102 evolutionary shifts between native and introduced ranges showed mixed results (e.g.  
103 Cipollini et al., 2005; Eigenbrode et al., 2008). Various responses are predicted to  
104 result from a decrease in the intensity and frequency of herbivory following  
105 introduction (Maron & Vilà, 2001; Agrawal & Kotanen, 2003), including an increase  
106 in plasticity (Cipollini et al., 2005; Lande, 2015) or high variability in inducible  
107 response among populations (Eigenbrode et al., 2008). Testing such shifts in invasive  
108 species would provide insight into the evolution of induced/constitutive trait defence  
109 more generally.

110 *Ambrosia artemisiifolia* is a highly suitable system to study adaptive  
111 divergence in defence-related traits during invasion. This native North American  
112 weed has successfully established globally (Oswalt & Marshall, 2008), including  
113 recent introductions to Europe (~160 years ago Chauvel et al., 2006) and Australia  
114 (~80 years ago; Palmer & McFadyen, 2012; van Boheemen et al., 2017). Repeated  
115 clinal associations were found in *A. artemisiifolia* populations included in the current  
116 study, with declines in size and increase in SLA at higher latitudes (van Boheemen et  
117 al., 2018). At comparable latitudes, European plants were bigger and had lower SLA  
118 than natives, while Australian plants had higher SLA leaves (van Boheemen et al.,  
119 2018).

120 We test for adaptive trait divergence in 1) physical defence (trichome density),  
121 2) chemical defence (phenolic compounds concentration and richness), and 3)  
122 inducibility of chemical defence among the native North American and introduced  
123 European and Australian ranges. Trichomes are found on the leaves and the stems of  
124 plants and deter herbivores (Kessler & Baldwin, 2002; Dalin et al., 2008; Tian et al.,  
125 2012). Phenolics are secondary metabolites that are often thought to confer resistance  
126 against herbivores (Bhattacharya et al., 2010; War et al., 2012; War et al., 2018).  
127 These compounds are also known to be inducible in response to herbivore damage, as  
128 well as simulated herbivory treatments including wounding and methyl jasmonate  
129 (MeJA) applications (e.g. Lee et al., 1997; Constabel & Ryan, 1998; Keinänen et al.,  
130 2001; Heredia & Cisneros-Zevallos, 2009). We accounted for non-adaptive genetic  
131 differences among populations potentially influencing trait variation using >11,000  
132 double-digest genotype-by-sequencing SNPs. Moreover, we controlled for defence-  
133 related trait variation along latitudinal clines.

134           We predict reduced constitutive defence within the introduced ranges together  
135 with elevated inducible response due to lower certainty of attack (Cipollini et al.,  
136 2005) and a more plastic (inducible) response in recent colonisations (Lande, 2015).  
137 We expect non-parallel defence gradients between native and introduced ranges due  
138 to divergence of clines in herbivory (Moles et al., 2011b) and/or variable resource  
139 gradients (Blumenthal, 2006; Hahn & Maron, 2016). Finally, we explored whether  
140 defence-related trait divergence between ranges could be explained by divergence in  
141 growth and SLA (van Boheemen et al., 2018). By considering the complex interplay  
142 of the evolutionary mechanisms shaping defence divergence among multiple ranges,  
143 we effectively test adaptive evolutionary changes in herbivore defence.

144

## 145 **METHODS**

### 146 *Study species*

147           *Ambrosia artemisiifolia* is a highly invasive monoecious, self-incompatible  
148 annual (Brandes & Nitzsche, 2006), most commonly found in disturbed habitats  
149 (Bassett & Crompton, 1975; Lommen et al., 2017) and is expected to expand its range  
150 with ongoing climate change (Chapman et al., 2014). It is the leading cause of hay  
151 fever worldwide (Tamarcaz et al., 2005) and has a significant impact on crop yields  
152 (Kazinczi et al., 2008). Within Europe, admixture following multiple introductions  
153 from distinct native sources has been contributed to the success of these introduced  
154 populations, and genetic variation equals levels observed in North America (Chun et  
155 al., 2010; Gladieux et al., 2010; Gaudeul et al., 2011; van Boheemen et al., 2017). A  
156 subsequent single bottlenecked introduction from Europe has been determined to have  
157 sourced the Australian invasion, although the exact European source is unknown (van  
158 Boheemen et al., 2017).

159           Within the native range, around 450 herbivores have been associated with  
160 *Ambrosia* species, of which about 30% are specific to the *Ambrosia* genus (Gerber et  
161 al., 2011). Native specialist *Ophraella communa* is shown to exert high levels of  
162 damage (Throop, 2005). Up to 50 polyphagous insect species have been associated  
163 with *A. artemisiifolia* in Europe, yet most cause little damage (Gerber et al., 2011;  
164 Essl et al., 2015). *Ophraella communa* has been sighted in Southern Switzerland and  
165 Northern Italy since 2013 (Müller-Schärer et al., 2014), where it greatly affects *A.*  
166 *artemisiifolia* seedling survival and growth (Cardarelli et al., 2018). In Australia,  
167 generalists *Zygogramma bicolorata* (leaf-feeding) and *Epiblema strenuana* (stem-  
168 boring) are widespread and seemingly exert some control (Palmer & McFadyen,  
169 2012).

170

#### 171 *Experimental set-up*

172           To explore the divergence of constitutive quantitative defence traits between  
173 native and introduced ranges (“constitutive-defence experiment”), while accounting  
174 for divergence along latitudinal clines, we collected *Ambrosia artemisiifolia* seeds in  
175 2013-2014 from broad geographical scales within the native North America and  
176 introduced Europe and Australia. We raised seedlings in a common garden (for  
177 detailed methods, see Supporting Information). Briefly, we stratified seeds for 6  
178 weeks at 4°C (Willemsen, 1975). After a 2-week germination at 30°C with 12h  
179 light/dark cycle, we randomly transplanted into 100ml kwikpot trays with Debco mix,  
180 followed by a second transplant to 0.7L pots containing Debco and 1.5ml slow-release  
181 fertilizer (Osmocote Pro, eight to nine months) one month later. We top-watered all  
182 plants and artificially manipulated daylight following the light cycle at the median  
183 latitude for all populations (47.3°N). To explore constitutive defence, we selected a



184 seedling from four maternal lines, originating from 28 North American, 32 European  
185 and 20 Australian locations (Supporting Information, Table S1).

186 A separate greenhouse experiment was conducted to test whether the  
187 inducibility of defence response varied among plant origins (hereafter, “induction  
188 experiment”). We used a subset of populations used in the constitutive experiment (10  
189 North American, 17 European and 12 Australian locations, Table S1). For each  
190 population, we selected four maternal lines, and grew two seedlings per line as above.  
191 One seedling per mom was allocated to either the control or simulated herbivory  
192 treatment. We simulated herbivory by vertically cutting off half of the newest fully  
193 formed leaf (wounding) and subsequently spraying the whole plant with 1mM methyl  
194 jasmonate (MeJA) (Campos-Vargas & Saltveit, 2002; Heredia & Cisneros-Zevallos,  
195 2009). Control plants were not wounded and were sprayed with distilled water.

196

#### 197 *Trait measurements*

198 For the constitutive experiment, we recorded trichome density at the mid-point  
199 of each plant under a dissecting microscope (Olympus, SZ-PT) using a 1 cm x 0.3 cm  
200 stem area at the mid-point of each plant, nine weeks after the second transplant. Three  
201 weeks later, we scanned one young, fully expanded leaf from each plant and  
202 calculated leaf area using ImageJ and the R package LeafArea (Katabuchi, 2015). We  
203 dried leaves at 45 °C for seven days and an addition 12 hours prior to weighing and  
204 weighed to the closest milligram. We calculated specific leaf area (SLA) by dividing  
205 leaf area by dry leaf weight ( $\text{mm}^2/\text{mg}$ ). We deconstructed plants for biomass  
206 measurements once the majority of seeds had ripened. We placed aboveground  
207 components in paper bags and dried these in ovens at 45 °C for at least 36 hours.  
208 Before dry weight biomass measures, we dried materials for an additional minimum

209 of 24 hours to ensure the dry weight was constant at the time of measuring and it was  
210 not variable due to humidity in the air or incomplete drying. We weighed this shoot  
211 biomass to the closest 0.1 gram.

212 Leaf samples for phenolic analyses were collected four weeks after the second  
213 transplant by clipping approximately 200 mg of the newest fully expanded leaf, which  
214 was flash frozen in liquid nitrogen and stored in a -80 °C. In the induction experiment,  
215 we collected leaf samples 24 hours after the final treatment. Samples were extracted  
216 in 1 ml of 80% methanol using a Qiagen TissueLyser II for 30 seconds at 30 rps twice  
217 and centrifuged for 30 minutes at 2700 rpm. Phenolic samples from the constitutive-  
218 defence experiment were analysed using HPLC Agilent 1200 series (Agilent  
219 Technologies Australia, Mulgrave, VIC, Australia) equipped with C18 reverse-phase  
220 column (Waters, 5.0 µm, 250 mm x 4.6 mm; Alltech Australia, Baulkham Hills NSW,  
221 Australia). The elution system consisting of solvents (A) 0.25% H<sub>3</sub>PO<sub>4</sub> in water (pH  
222 2.2) and (B) acetonitrile was: 0–6 min, 0–12% of B; 6–10 min, 12–18% of B, and 10–  
223 30 min, 18–58% of B, with a flow rate of 1 mL/min and injection volume of 15 µL  
224 (Keinänen et al., 2001). Samples from the induction experiment were analysed with  
225 Agilent Infinity 1260 equipped with C18 reverse-phase column (Poroshell 120 EC-  
226 C18, 2.7 µm, 150 mm x 3.0 mm; Agilent Technologies Australia, Mulgrave, VIC,  
227 Australia). The elution method was modified from above and was: 0–2 min, 0–12% of  
228 B; 2–3.3 min, 12–18% of B, and 3.3–10 min, 18–58% of B, with a flow rate of 0.5  
229 mL/min and injection volume of 5 µL. In both experiments, phenolic compound  
230 peaks were identified to their compound classes using UV spectra and relative  
231 abundance was quantified at 320 nm. To estimate phenolic compound richness, we  
232 counted the number of detectable peaks. Concentration of eight major phenolic peaks  
233 was estimated as area under each peak divided by sample fresh weight. Results could

234 not be directly compared as the two experiments were performed in different  
235 greenhouses and samples from each experiment were run using different HPLC  
236 machines.

237

### 238 *Statistical analyses*

239 To test if constitutive defence differed among ranges (the constitutive  
240 experiment), we included range, latitude, their interaction and a latitude<sup>2</sup> effect as  
241 fixed factors in each model. We examined phenolic compound composition in a  
242 multivariate analysis of covariance (MANCOVA) by including the concentration of  
243 eight major phenolic compounds. We increased the power of this analysis by  
244 removing highly correlated peaks (Spearman's  $\rho > 0.75$ ) (Scheiner, 2001), resulting in  
245 the inclusion of all eight peaks. We calculated Wilks'  $\lambda$  (multivariate F-value) to  
246 measure the strength of the associations. We then examined concentration of  
247 individual phenolic compounds, phenolic compound richness, total phenolic  
248 concentration, and trichome density in univariate mixed models. Here, we controlled  
249 for neutral population structure, possibly shaping trait variation between populations,  
250 by including q-values as obtained from STRUCTURE analysis performed on genetic  
251 data as a random effect. Within multi- and univariate analyses, we improved  
252 normality of the data by square-rooting or log-transforming traits where appropriate.  
253 We computed type III Wald F-values with Kenward-Roger degrees of freedom and  
254 step-wise removed non-significant effects, starting with the highest order interaction.  
255 For univariate models, we plotted the partial residuals of each response variable by  
256 ranges, thus accounting for latitudinal clines and neutral population genetic structure.

257 To explore the variation in inducibility among ranges (the induction  
258 experiment), we repeated the steps for the constitutive experiment, now including

259 treatment and its interactions with range and latitude as fixed effects. For the  
260 MANCOVA, we excluded five peaks with  $p < 0.75$ . We retained treatment in these  
261 models, as this was the variable of interest. Here, a significant treatment effect would  
262 signify an inducible response, whereas a treatment x range interaction would imply  
263 this response differs between ranges. A treatment x latitude interaction would indicate  
264 different inducibility at different latitudes. To test if variation in induction differed  
265 between ranges (Eigenbrode et al., 2008), we compared the coefficient of variation  
266 ( $c_v$ ) using the modified signed-likelihood ratio test for equality with  $10^4$  simulations in  
267 the *cvequality* package (Krishnamoorthy & Lee, 2014; Marwick & Krishnamoorth,  
268 2018).

269 To examine associations between defence-related traits and plant growth and  
270 to assess if divergence in individual resource budgets could have resulted in range  
271 differences in defence-related trait investment, we tested responses of phenolic  
272 richness, phenolic concentrations or trichome density to shoot biomass or SLA. Each  
273 model included a defence-related trait as response, with shoot biomass or SLA, range  
274 and their interaction as predictors. We used individual trait values and included  
275 individual STRUCTURE q-values and sampling location as random factors. We  
276 explored significant range x defence interactions using a Holm p-value correction in  
277 the *phia* package (De Rosario-Martinez, 2013). In these models, a negative  
278 association between defence-related traits and shoot biomass would suggest a trade-  
279 off, while a positive one might indicate differences in resource acquisition. Range  
280 differences at similar values of shoot biomass or SLA would indicate defence-related  
281 trait divergence independent of genotypic differences in individual resource budgets.

282 To explore if constitutive and inducible defence trade off, we first calculated  
283 the induced level of total phenolics for each maternal line as the difference between

284 damage and control treatments of the two half-sibs. This estimate of induction is  
285 thought to reduce correlations with control treatment estimates and thus the collinear  
286 associations (e.g. due to genotypic biases) will not mask the trade-off associations  
287 (Morris et al., 2006). We included population of origin and individual q-values as  
288 random factor in these models. A significant negative association between induced  
289 and constitutive levels of phenolic concentration and richness would indicate the  
290 presence of a trade-off. All statistical analyses were conducted in R v3.4.3 (R Core  
291 Team, 2017).

292

## 293 **RESULTS**

### 294 *Constitutive defence trait divergence between ranges*

295 We found significant range divergence in constitutive phenolic composition (Table  
296 1a), resulting from differences between the introduced Europe and the native North  
297 America ( $F_{8,66}=3.280$ ,  $p=0.010$ , Wilks'  $\lambda=0.716$ ; Table 1b). Phenolic peak richness  
298 differed among ranges (Table 1a): it was highest in the introduced European range  
299 (adjusted mean of 43 peaks) followed by the native North American (40 peaks) and  
300 introduced Australian ranges (33 peaks). Total phenolic concentration was similar  
301 between the native and European populations, but 28% lower in Australia (Table 1b,  
302 Fig. 1). Trichome density showed no differences between ranges (Table 1a, Fig. 1).  
303 The composition of individual phenolic compounds and peak richness depended on  
304 latitude, though no such effect was found for the total phenolic concentration or  
305 trichome density (Table 1a, Fig. 2). We did not observe range x latitude interactions  
306 for any of the defence-related traits (Table 1a), suggesting latitudinal clines, when  
307 present, did not differ between ranges.

308

309 **Table 1.** *Ambrosia artemisiifolia* defence-related trait responses (population means) to range, latitude, their interaction and  
 310 latitude<sup>2</sup> in the constitutive experiment in multivariate (individual phenolic compounds) and univariate analyses (a), with  
 311 dissection of significant range effects (p<0.05) in post-hoc tests (b). We reported Wald type III F (a) or  $\chi^2$  test values (b),  
 312 Kenward-Roger degrees of freedom (subscript), significance (symbols) and Wilk's  $\lambda$  (multivariate analysis only). Models were  
 313 step-wise reduced starting with the highest order non-significant interaction and univariate analyses included neutral population  
 314 genetic structure as a random effect.

315

| a.                                        | Range                                             | Latitude                                        | Latitude <sup>2</sup>                         | Range:Latitude                                     |
|-------------------------------------------|---------------------------------------------------|-------------------------------------------------|-----------------------------------------------|----------------------------------------------------|
| Individual phenolic compounds composition | 4.520 <sub>16,132</sub> ***,<br>$\lambda = 0.417$ | 6.928 <sub>8,66</sub> ***,<br>$\lambda = 0.544$ | 2.814 <sub>8,66</sub> *,<br>$\lambda = 0.746$ | 0.849 <sub>16,128</sub> (ns),<br>$\lambda = 0.817$ |
| Phenolic richness                         | 7.615 <sub>2,58,48</sub> **                       | 7.79 <sub>1,71,66</sub> **                      | 0.046 <sub>1,53,51</sub> (ns)                 | 2.027 <sub>2,69,64</sub> (ns)                      |
| Phenolic concentration                    | 8.601 <sub>1,71,918</sub> ***                     | 0.934 <sub>1,73,244</sub> (ns)                  | 0.036 <sub>1,72,973</sub> (ns)                | 0.127 <sub>1,70,054</sub> (ns)                     |
| Trichome density                          | 0.663 <sub>2,71,183</sub> (ns)                    | 1.825 <sub>1,66,941</sub> (ns)                  | 3.148 <sub>1,74,991</sub> #                   | 0.121 <sub>2,69,141</sub> (ns)                     |

316

| b.                                        | North America - Europe                          | North America - Australia                        | Europe - Australia                               |
|-------------------------------------------|-------------------------------------------------|--------------------------------------------------|--------------------------------------------------|
| Individual phenolic compounds composition | 3.280 <sub>8,66</sub> ***,<br>$\lambda = 0.716$ | 1.580 <sub>8,66</sub> (ns),<br>$\lambda = 0.840$ | 1.994 <sub>8,66</sub> (ns),<br>$\lambda = 0.805$ |
| Phenolic richness                         | 4.783 <sub>1</sub> *                            | 12.725 <sub>1</sub> ***                          | 15.843 <sub>1</sub> ***                          |
| Phenolic concentration                    | 1.397 <sub>1</sub> (ns)                         | 9.311 <sub>1</sub> **                            | 17.321 <sub>1</sub> ***                          |

317

ns: p>0.1; #: p<0.1, \*: p<0.05; \*\*: p<0.01; \*\*\*: p<0.001

318

319

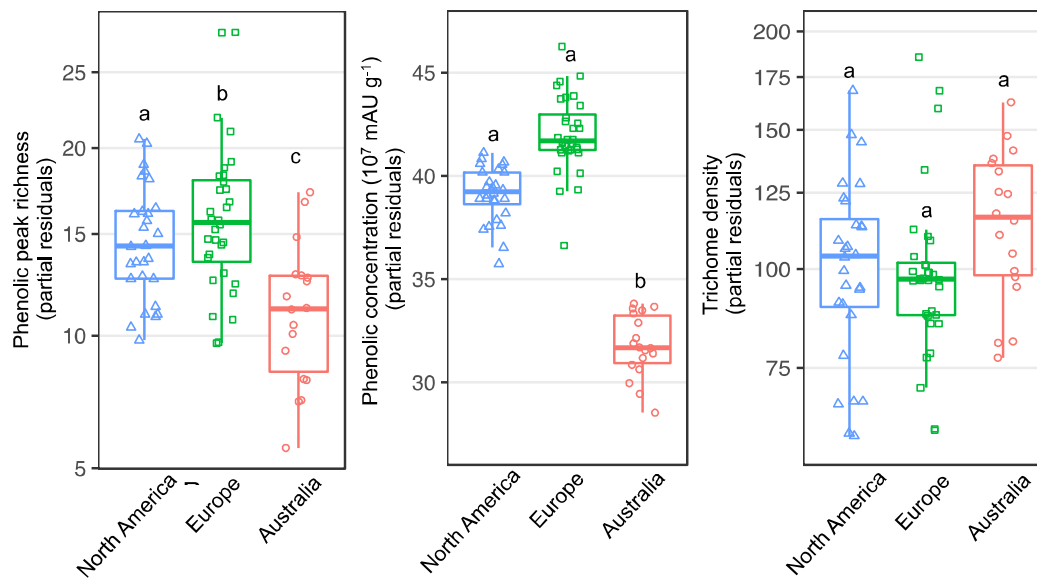

320

321

322

323

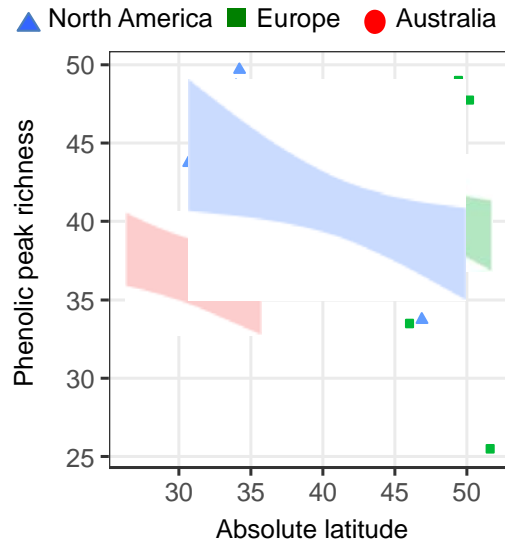

324

325 **Fig. 2.** Population mean response of phenolic peak richness to range (native North America, blue triangles; introduced Europe,  
326 green squares; introduced Australia, red circles) and latitude in *Ambrosia artemisiifolia*, with predicted latitudinal clines (+/- 95%  
327 confidence interval) corrected for neutral population structure.

328

### 329 *Inducible defence trait divergence between ranges*

330 We found a significant treatment effect on individual phenolic compound  
331 composition in the induction experiment ( $F_{5,59}=12.014$ ,  $p<0.001$ , Wilks'  $\lambda=0.496$ ;  
332 Table 2). Phenolic peak richness did not show a response to experimental treatment  
333 (Table 2, Fig. 3). However, the total phenolic concentration was slightly suppressed in  
334 the herbivory simulating treatment (Table 2, Fig. 3). We identified no treatment x  
335 range x latitude interactions (Table 2, Fig. 3), suggesting there is no range difference  
336 in inducibility clines. Also, the absence of treatment x latitude interactions (Table 2,  
337 Fig. 3), suggests an overall lack of latitudinal clines in inducibility. Moreover, no  
338 treatment x range interactions (Table 2, Fig. 3) suggests the inducible response did not  
339 differ between ranges. We did not find range differences in the variation of inducible  
340 phenolic peak richness ( $c_v=1.401$ ,  $p=0.496$ ) or concentration ( $c_v=2.297$ ,  $p=0.317$ ).

341 **Table 2.** *Ambrosia artemisiifolia* defence-related trait responses (population means) to range, latitude, treatment, their interactions and latitude<sup>2</sup> in the inducible experiment in multivariate (individual phenolic  
 342 compounds) and univariate analyses. Range, latitude, their interaction or latitude<sup>2</sup> were included as covariates and significant results were not explored further. Reported Wald type III F-test values, Kenward-Roger  
 343 degrees of freedom (subscript), significance (symbols) and Wilk's  $\lambda$  (multivariate analysis only). Models were step-wise reduced starting with the highest order non-significant interaction and univariate analyses  
 344 included neutral population genetic structure as a random effect.

|                                             | Range                                           | Latitude                                       | Latitude <sup>2</sup>                        | Range:Latitude                                | Treatment                                      | Treatment:Range                                  | Treatment:Latitude                             | Treatment:Range:Latitude                         |
|---------------------------------------------|-------------------------------------------------|------------------------------------------------|----------------------------------------------|-----------------------------------------------|------------------------------------------------|--------------------------------------------------|------------------------------------------------|--------------------------------------------------|
| Individual phenolic compounds concentration | 7.591 <sub>10,118</sub> ***,<br>$\lambda=0.370$ | 10.637 <sub>5,59</sub> ***,<br>$\lambda=0.526$ | 4.818 <sub>5,59</sub> **,<br>$\lambda=0.710$ | 2.311 <sub>10,118</sub> *,<br>$\lambda=0.699$ | 12.014 <sub>5,59</sub> ***,<br>$\lambda=0.496$ | 0.326 <sub>10,112</sub> (ns),<br>$\lambda=0.944$ | 0.977 <sub>5,58</sub> (ns),<br>$\lambda=0.922$ | 1.357 <sub>10,108</sub> (ns),<br>$\lambda=0.789$ |
| Phenolic richness                           | 3.764 <sub>2,29,93</sub> *                      | 4.700 <sub>1,31,08</sub> *                     | 1.340 <sub>2,28,24</sub> (ns)                | 6.030 <sub>1,30,95</sub> *                    | 0.850 <sub>1,35,33</sub> (ns)                  | 0.091 <sub>2,32,1</sub> (ns)                     | 0.825 <sub>1,34,89</sub> (ns)                  | 1.923 <sub>2,30,78</sub> (ns)                    |
| Phenolic concentration                      | 4.970 <sub>2,30,905</sub> *                     | 5.932 <sub>1,31,505</sub> *                    | 1.577 <sub>2,28,556</sub> (ns)               | 1.745 <sub>1,31,505</sub> (ns)                | 4.241 <sub>1,35,628</sub> *                    | 0.005 <sub>2,32,285</sub> (ns)                   | 1.077 <sub>1,35,428</sub> (ns)                 | 1.417 <sub>2,31,192</sub> (ns)                   |

345 ns:  $p > 0.1$ ; #:  $p < 0.1$ ; \*:  $p < 0.05$ ; \*\*:  $p < 0.01$ ; \*\*\*:  $p < 0.001$   
 346

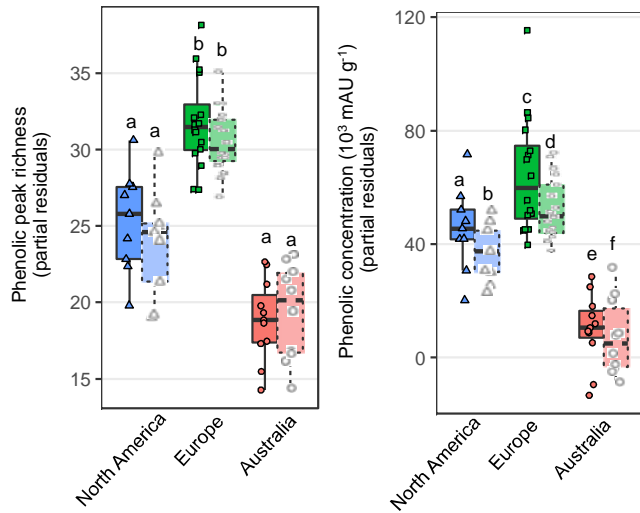

347 **Fig. 3.** Partial residual defence trait responses (phenolic peak richness and concentration) of *A. artemisiifolia* populations to control (solid symbols) and herbivore simulating treatment (wounding + MeJA, dashed  
 348 transparent symbols), with covariates of range, accounting for latitudinal clines and neutral population structure. Letters indicate significance of effect (Table 2).  
 349



350 *Associations between defence, biomass and specific leaf area (SLA)*

351 Within each range, phenolic richness and total concentration was positively  
 352 correlated with shoot biomass (Table 3, Fig. 4a-b), whereas we found a negative  
 353 association between trichome density and shoot biomass (Table 3, Fig. 4c). We found  
 354 high-SLA leaves had lower phenolic peak richness (Fig. 4d) and concentration (Fig.  
 355 4e), yet higher trichome density (Table 3, Fig. 4f). No interactions were significant  
 356 between range and predictor variables (shoot biomass or SLA), suggesting these  
 357 associations among traits were consistent between ranges (Table 3, Fig. 4). These  
 358 results emphasize the close relationship between plant growth, morphology and  
 359 defence.

360

361 **Table 3.** Constitutive defence trait response of *Ambrosia artemisiifolia* individuals to shoot biomass, specific leaf area and their  
 362 interaction with range (a), with dissection of significant range effects ( $p < 0.05$ ) in post-hoc tests (b). We reported Wald type III F  
 363 (a) or  $\chi^2$  test values (b), Kenward-Roger degrees of freedom (subscript) and significance (symbols). Models were step-wise  
 364 reduced starting with the highest order non-significant interaction and included population origin and neutral population genetic  
 365 structure as random effects.

366

a.

| Predictor          | Response               | Range                          | Predictor                       | Range:Predictor                |
|--------------------|------------------------|--------------------------------|---------------------------------|--------------------------------|
| Shoot biomass      | Phenolic richness      | 18.96 <sub>2,79.29</sub> ***   | 53.389 <sub>1,180.51</sub> ***  | 1.565 <sub>2,187.82</sub> (ns) |
|                    | Phenolic concentration | 19.321 <sub>2,79.435</sub> *** | 31.098 <sub>1,181.299</sub> *** | 1.441 <sub>2,184.26</sub> (ns) |
|                    | Trichome density       | 10.242 <sub>2,79.4</sub> ***   | 18.49 <sub>1,174.06</sub> ***   | 0.525 <sub>2,180.84</sub> (ns) |
| Specific leaf area | Phenolic richness      | 5.349 <sub>2,69.16</sub> **    | 42.692 <sub>1,217.97</sub> ***  | 0.32 <sub>2,202.6</sub> (ns)   |
|                    | Phenolic concentration | 6.162 <sub>2,71.167</sub> **   | 38.464 <sub>1,208.912</sub> *** | 0.98 <sub>2,202.53</sub> (ns)  |
|                    | Trichome density       | 1.828 <sub>2,71.7</sub> (ns)   | 10.994 <sub>1,204.66</sub> **   | 1.196 <sub>2,206.12</sub> (ns) |

367

b.

| Predictor          | Response               | North America - Europe  | North America - Australia | Europe - Australia      |
|--------------------|------------------------|-------------------------|---------------------------|-------------------------|
| Shoot biomass      | Phenolic richness      | 2.546 <sub>1</sub> (ns) | 26.667 <sub>1</sub> ***   | 37.964 <sub>1</sub> *** |
|                    | Phenolic concentration | 5.846 <sub>1</sub> *    | 22.155 <sub>1</sub> ***   | 40.087 <sub>1</sub> *** |
|                    | Trichome density       | 2.255 <sub>1</sub> (ns) | 13.049 <sub>1</sub> ***   | 21.047 <sub>1</sub> *** |
| Specific leaf area | Phenolic richness      | 0.459 <sub>1</sub> (ns) | 6.655 <sub>1</sub> *      | 10.643 <sub>1</sub> **  |
|                    | Phenolic concentration | 2.152 <sub>1</sub> (ns) | 5.032 <sub>1</sub> *      | 12.485 <sub>1</sub> **  |
|                    | Trichome density       | -                       | -                         | -                       |

368 ns:  $p > 0.1$ ; #:  $p < 0.1$ ; \*:  $p < 0.05$ ; \*\*:  $p < 0.01$ ; \*\*\*:  $p < 0.001$

369

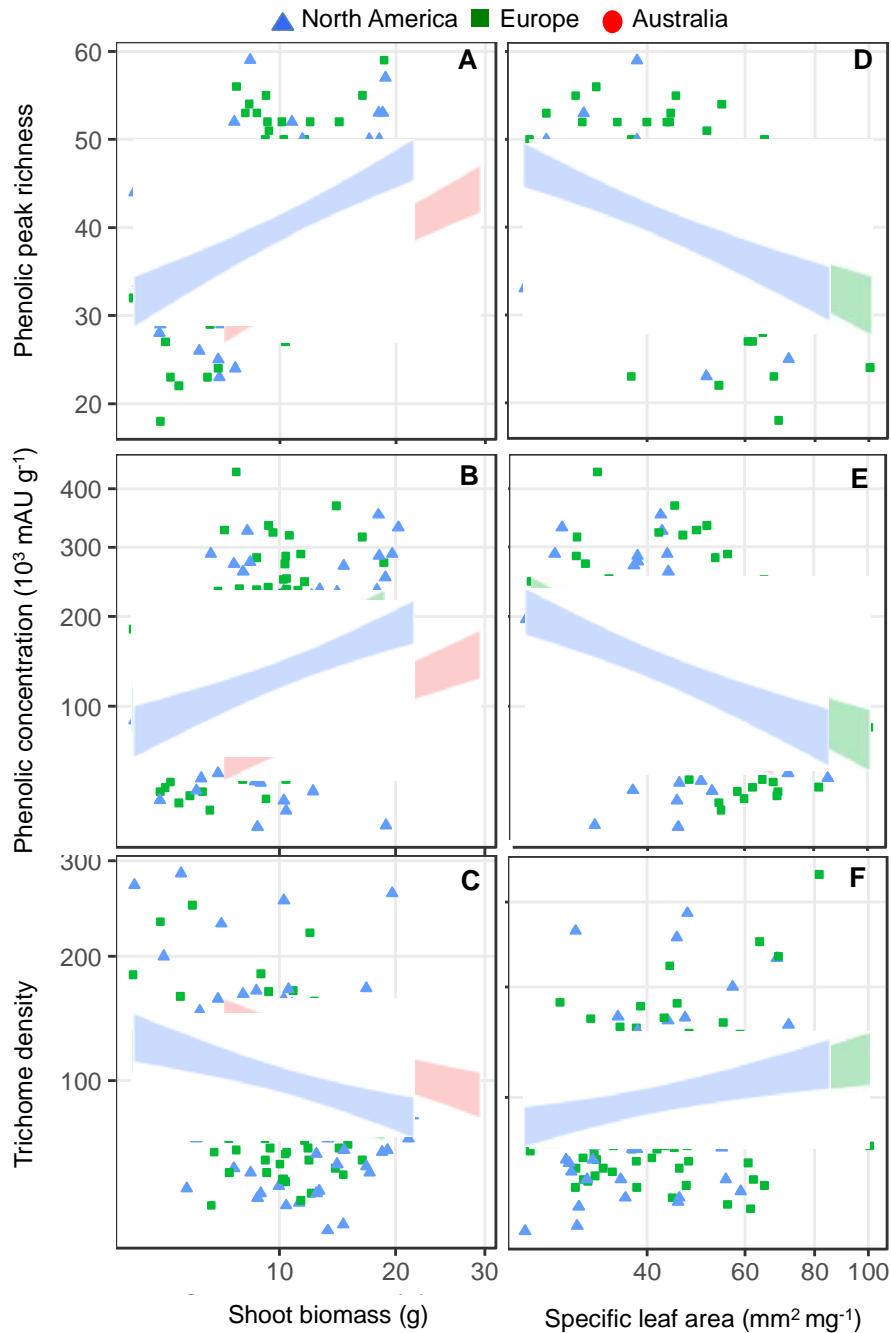

370  
371 **Fig 4.** Defence trait responses (phenolic peak richness, concentration and trichome density) of *A. artemisiifolia* individuals to  
372 range (native North America (blue triangles); Europe (green squares); Australia (red circles)), shoot biomass (a-c) or specific leaf  
373 area (d-f) with model predictions (+/- 95% confidence interval, Table 4).

374

375 At comparable shoot biomass or SLA, phenolic peak richness was no longer  
376 significantly different between North America and Europe (Table 3, Fig. 4a & d)  
377 compared to range comparisons accounting for latitude (Table 1, Fig. 1). Conversely,

378 total phenolic concentration in European plants was higher compared to North  
379 American individuals of comparable weight (Table 3, Fig. 4b), whereas no difference  
380 existed in latitude models (Table 1, Fig. 1). Australian plants exhibited lower phenolic  
381 peak richness and concentration compared to native or European plants of comparable  
382 weight or SLA. Yet, at the same plant weight, Australian plants had higher trichome  
383 densities than in the other ranges (Table 3, Fig. 4c). These patterns match previous  
384 analyses including latitude (Table 1, Fig. 1).  
385

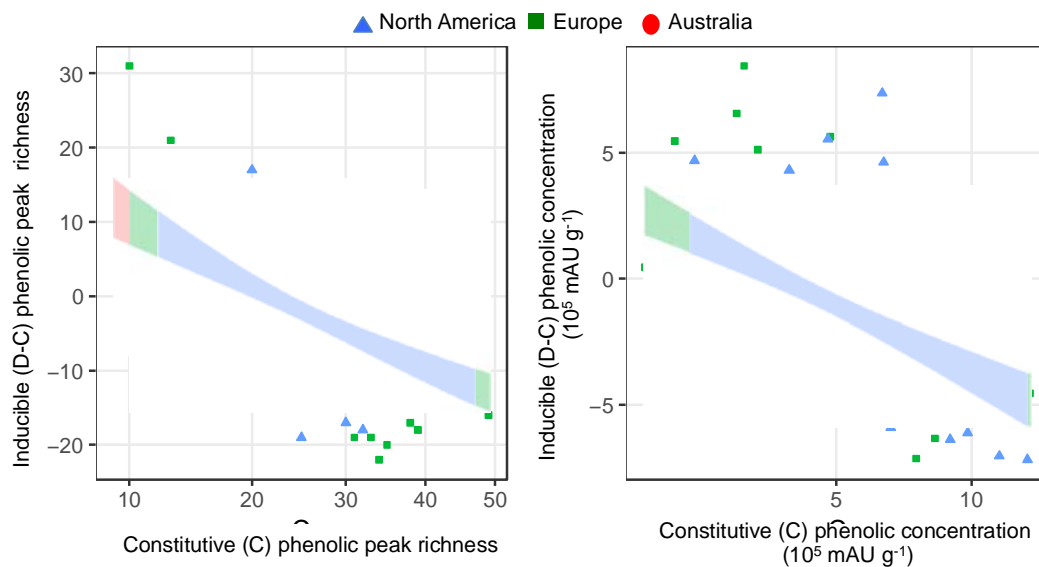

386  
387 **Fig. 5.** Inducible (D: wounding + MeJA; C: control) versus constitutive (control) defence trait responses (phenolic peak richness  
388 and concentration) of *A. artemisiifolia* populations among ranges (native North America: blue triangles; Europe: green squares;  
389 Australia: red circles) with model predictions ( $\pm$  95% confidence interval).  
390

### 391 *Constitutive-inducible trade-offs*

392 Induced levels of phenolic richness and total concentration were negatively  
393 associated with constitutive levels (richness:  $F_{1,123.81}=78.126$ ,  $p<0.001$ ; concentration:  
394  $F_{1,141.88}=76.286$ ,  $p<0.001$ ; Fig. 5). We found no range differences in either trait  
395 (richness:  $F_{2,31.518}=1.719$ ,  $p=0.196$ ; concentration:  $F_{2,31.07}=0.265$ ,  $p=0.769$ ; Fig. 5), nor  
396 did we identify interactions between range and the phenolic concentration

397 ( $F_{2,141.11}=0.866$ ,  $p=0.423$ ). Range x phenolic peak richness ( $F_{2,129.82}=3.045$ ,  $p=0.051$ )  
398 was marginally significant. These results suggest that constitutive and inducible  
399 defence trade off, although there is no difference between ranges.

400

## 401 **DISCUSSION**

402 In this study, we show the Evolution of Increased Competitive Ability (EICA)  
403 hypothesis fails as a general explanation of repeated intraspecific defence-related trait  
404 divergence across multiple introduced ranges. Though we observed reduced phenolic  
405 richness and concentration in introduced Australia compared to the native plants  
406 while controlling for genetic structure, levels were similar or slightly higher in the  
407 introduced Europe compared to native populations at comparable latitudes and energy  
408 budgets. In addition, trichome density did not differ among ranges. In line with  
409 predictions, a trade-off between the constitutive and inducible phenolics was observed  
410 together with similar phenolic inducibility among ranges. Inconclusive support for  
411 EICA has been shown in inter- (Felker & Quinn et al., 2013) and intraspecific  
412 comparisons (Colomer & Ventura et al., 2015). To our knowledge however, this is the  
413 first study testing EICA across multiple introductions while exploring the predicted  
414 confounding of latitudinal clines, population substructure or genotypic differences in  
415 individual energy budgets. Therefore, the apparent absence of the predicted repeated  
416 selection against high defence investment following introduction is unlikely to be  
417 entirely masked by these factors. We examine these processes in detail and suggest  
418 alternative mechanisms driving defence-trait divergence within and among native and  
419 introduced ranges.

420

421 *Divergence in constitutive defence-related traits*

422           We found conflicting patterns of defence-related trait divergence between the  
423 native and two introduced ranges. Biotic and abiotic latitudinal clines in focal traits  
424 (Colautti et al., 2009), genotypic differences in resource acquisition (Van Noordwijk  
425 & de Jong, 1986; Agrawal, 2011; Züst & Agrawal, 2017) and historical contingency  
426 (Lee, 2002; Facon et al., 2006; Prentis et al., 2008; Rius & Darling, 2014; Estoup et  
427 al., 2016) can obscure trade-offs predicted under EICA. Accordingly, in addition to  
428 latitudinal clines in phenolic compound composition and peak richness (Fig. 2), we  
429 show trichome density, phenolic peak richness and concentration were strongly  
430 associated with plant biomass and specific leaf area (SLA)(Fig. 4). Contrary to EICA  
431 predictions, phenolic richness was significantly higher in Europe than North America  
432 at equivalent latitudes, but this likely reflects the larger size and lower SLA of  
433 European plants at similar latitudes (van Boheemen et al., 2018). Similarly, phenolic  
434 peak concentration was significantly higher in Europe compared to native North  
435 America at comparable shoot biomass, although this difference disappeared when  
436 controlling for latitude or SLA. However, lower phenolic peak richness and  
437 concentration in Australia was still present at similar latitude, biomass or SLA  
438 compared to North America. Invasion history is unlikely a major factor in this  
439 observed defence-related trait divergence as we accounted for population genetic  
440 structure in our analysis.

441           An adaptive reduction of constitutive defence traits following introduction to  
442 Europe and Australia was predicted due to a general release from natural enemies.  
443 However, levels of chemical defence-related traits (phenolic richness and  
444 concentration) were not consistently lower in introduced ranges compared to native  
445 populations. Such unexpected findings could have resulted from variation in  
446 contemporary herbivory among introduced ranges. Of particular relevance to the

447 EICA hypothesis are specialist herbivores, as herbivory by specialists, but not  
448 necessarily generalists, is hypothesized to consistently decline during invasion  
449 (Muller-Scharer et al., 2004; Joshi & Vrieling, 2005; Felker & Quinn et al., 2013).  
450 Indeed, introduced Japanese *A. artemisiifolia* populations re-exposed to specialist leaf  
451 beetle *Ophraella communa* for >10 years were more resistant than herbivore-free  
452 populations (Fukano & Yahara, 2012). However, rapid adaptation to *O. communa* is  
453 unlikely to have led to the observed elevated European phenolic concentration and  
454 richness, as the seeds used in our experiment were collected in 2014 and this beetle is  
455 constrained to southern Europe since introduction in 2013 (Sun et al., 2017).

456         Alternatively, differences in generalist load between introduced ranges could  
457 have resulted in variation in quantitative digestibility-reducing chemicals (e.g.  
458 phenolics), which defend against both generalist and specialists (Muller-Scharer et al.,  
459 2004). Surveys describe a high diversity of generalist species in Europe (Gerber et al.,  
460 2011; Essl et al., 2015) not identified in Australia (Palmer & McFadyen, 2012)  
461 suggesting herbivory in this species is higher in Europe than Australia. However,  
462 Genton et al. (2005) previously found that compared to native Ontario, the most  
463 common forms of damage (chewing and perforation) together with the generalist  
464 herbivore load was reduced in introduced France populations consistent with enemy  
465 escape in Europe compared to native North America. Contradicting EICA  
466 expectations, but consistent with our findings for Europe, the French plants showed  
467 no evolutionary loss of defence (Genton et al., 2005). Therefore, although reductions  
468 in both specialists and generalist herbivores have been documented in both introduced  
469 ranges, we did not find parallel changes in defence-related traits as predicted by  
470 EICA, suggesting such predictions are perhaps too simplistic. Nevertheless, a more  
471 detailed survey of herbivory, resistance and the mechanisms of resistance across all

472 three ranges is warranted, particularly given the contrasting patterns of divergence in  
473 phenolics identified among the two introduced ranges.

474 We found no support for the EICA-predicted resource allocation trade-off  
475 between defence and growth in Europe. However, even when these traits have  
476 evolved in the EICA predicted direction, negative genetic correlations have yet to be  
477 detected (Franks et al., 2008; Schrieber et al., 2017; Hodgins et al., 2018).  
478 Furthermore, a direct trade-off might not be evident as resource reallocation from  
479 other traits, drawing from the same resource pool, could allow for the elevated  
480 investment in defence related traits and growth simultaneously (Züst & Agrawal,  
481 2017; Hodgins et al., 2018). For instance, an analysis of climate niche shifts in *A.*  
482 *artemisiifolia* has revealed that Eurasian and Australasian ranges on average  
483 experience warmer, wetter climates compared to the North American range (van  
484 Boheemen et al., 2018). Therefore, reduced investment in abiotic stress tolerance  
485 could have allowed for resource reallocation to defence and growth simultaneously.  
486 These recently acknowledged complex dynamics underlying competitive ability call  
487 for more integrative tests of invasive spread.

488 The rapid and repeated latitudinal divergence in phenolic compound  
489 composition and richness populations suggests direct or indirect selection of latitude-  
490 associated factors. Corresponding to our findings, typical reported patterns include  
491 high growth and low defence at more productive high-resource (Coley et al., 1985;  
492 Zandt, 2007; Endara & Coley, 2011), low-latitude (Woods et al., 2012; Moreira et al.,  
493 2014; Hahn & Maron, 2016) environments (Blumenthal, 2006). Native clines in  
494 herbivore load could result in such observations, though the predicted herbivore  
495 absence following introduction should lead to non-parallel defence clines among  
496 native and introduced ranges (Cronin et al., 2015; Allen et al., 2017). However, in our

497 data, latitudinal clines in defence-related traits (phenolic compound composition and  
498 peak richness) were parallel, suggesting consistent patterns of selection with latitude  
499 in all three ranges. The absence of the predicted patterns could result from parallel  
500 clines in herbivore loads in each range or the presence of alternative evolutionary  
501 forces driving latitudinal trait divergence in the multiple ranges. Clinal variation in  
502 herbivory is not as common as previously thought (Moles et al., 2011a) and  
503 geographic information on *A. artemisiifolia* herbivore pressure is needed.

504         Alternatively, latitudinal clines could arise through direct selection on the  
505 alternative functions of phenolic compounds (e.g. antioxidant activity, Sakihama et  
506 al., 2002) or indirect selection through genetic covariance with traits under climate  
507 mediated selection. Climate was previously shown to be a more important driver of  
508 trait divergence compared to enemy release (Colautti et al., 2009; Colautti & Barrett,  
509 2013; Colomer & Ventura et al., 2015). Accordingly, climatic differences between the  
510 ranges not captured by latitude could contribute to patterns of divergence in  
511 Australian defence-related traits. For instance, trichomes protect plants from UV  
512 (Bassman, 2004; Hauser, 2014) and selection for this alternate function in high-UV  
513 Australia (WHO, 1998) could potentially explain the higher density of trichomes in  
514 this range when controlling for plant size. Herbivore exclusion experiments at various  
515 latitudes and environments would be required to disentangle how resource  
516 availability, herbivory and other climatic factors might interact during invasion and  
517 impact the evolution of growth and defence traits.

518

#### 519 *Constitutive versus induced range divergence*

520         We observed a negative association between constitutive and inducible  
521 defence-related traits suggesting a trade-off (Koricheva et al., 2004; Agrawal et al.,



522 2010). A decrease in the level and predictability of attack in the introduced range is  
523 expected to cause a reduction in constitutive defence and the maintenance or increase  
524 in inducible defence (Cipollini et al., 2005; Orians & Ward, 2010; Lande, 2015). In  
525 agreement with this prediction constitutive phenolic levels were reduced in Australia,  
526 while inducible response did not differ among ranges. Such maintenance of mean  
527 inducibility could result from insufficient herbivore pressure, where a selection-drift  
528 imbalance could increase inducible variability (Eigenbrode et al., 2008). Although  
529 analysis of neutral markers suggests genetic drift has been particularly strong in  
530 Australia (van Boheemen et al., 2017), we did not reveal any increase in inducible  
531 variation. The growing body of literature testing constitutive versus inducible defence  
532 in native and introduced ranges frequently report inconsistent results varying from  
533 reductions, to maintenance, to increases in either defence (Cipollini et al., 2005;  
534 Eigenbrode et al., 2008; Beaton et al., 2011; Carrillo et al., 2012; Cipollini &  
535 Lieurance, 2012; Wang et al., 2012; Wang et al., 2013; Fortuna et al., 2014; Gu et al.,  
536 2014; Agrawal et al., 2015; Macel et al., 2017) and calls for more detailed research on  
537 the costs-benefit trade-offs of the various responses.

538 Remarkably, we found evidence of a suppression of phenolics in response to  
539 herbivore simulation for some populations, especially those with high constitutive  
540 levels, in contrast to some previous studies (Lee et al., 1997; Constabel & Ryan, 1998;  
541 Keinänen et al., 2001; Heredia & Cisneros-Zevallos, 2009). Conversely, cardenolide  
542 suppression was found in various *Asclepias* species at high constitutive levels  
543 (Rasmann et al., 2009), though the mechanistic cause was not discussed (Agrawal et  
544 al., 2010). We propose that the retraction of phenolics from damaged leaves could  
545 indicate a cost-reducing response when the inducible phenolic compounds have  
546 alternative functions (e.g. allelopathic interactions and plant structure; Bhattacharya et

547 al., 2010; Li et al., 2010), or function only in particular aspects of defence response,  
548 not induced by the treatment. Nevertheless, gaining insight into such cost-benefit  
549 associations might prove difficult due to, for instance, issues identifying and  
550 addressing all factors influencing the investment of defence-related traits (Neilson et  
551 al., 2013).

552

### 553 *Conclusion*

554 We show that escape from natural enemies is not likely the single force  
555 driving the evolution of increased competitive ability in this invasive, as enhanced  
556 growth in European populations was not in lieu of defence-related trait reduction.  
557 Trait evolution in Australian populations, derived from European founders, occurred  
558 rapidly (~80 generations), seemingly unconstrained by strong genetic bottleneck  
559 identified in this range (van Boheemen et al., 2017), as measured traits in these two  
560 invaded ranges are primarily on opposing ends of the phenotypic spectrum of values.  
561 Evidence is growing that adaptation to climate might explain the alarming spread and  
562 success of non-natives to a greater extent than release from natural enemies (Colautti  
563 et al., 2009; Colautti & Barrett, 2013; Colomer & Ventura et al., 2015). This study  
564 emphasizes that intraspecific multi-introduction tests of adaptive trait divergence of  
565 invasive species are helpful for understand contemporary evolutionary process during  
566 range expansion.

567

### 568 **ACKNOWLEDGEMENTS**

569 We would like to thank J. Stephens and A. Wetherhill for sample collection,  
570 M. Kourtidou and J. Taylor for greenhouse assistance and K. Nurkowski for genomic  
571 analyses. A Monash University Dean's International Postgraduate Research

572 Scholarship was provided to LAB, a Monash University Startup Grant to KAH.

573

#### 574 **AUTHOR CONTRIBUTIONS**

575 All authors developed the project, with data collection and analyses carried out  
576 by LAB and SB, refined by AU and KH. All authors discussed the results, contributed  
577 to the MS writing and gave final approval for publication.

578

#### 579 **DATA ACCESSIBILITY**

580 Sequence data are available at the National Center for Biotechnology  
581 Information (NCBI) Sequence Read Archive under Bioproject PRJNA449949.

582

#### 583 **REFERENCES**

584

585

586 Agrawal, A. A. (2011) Current trends in the evolutionary ecology of plant defence.  
587 *Functional Ecology*, 25(2), 420-432.

588 Agrawal, A. A., Conner, J. K. & Rasmann, S. (2010) Tradeoffs and negative  
589 correlations in evolutionary ecology. *Evolution since Darwin: the first 150*  
590 *years* (eds M. A. Bell, D. J. Futuyma, W. F. Eanes & J. S. Levinton), pp. 243-  
591 268. Sinauer Associates, Sunderland, Massachusetts, USA.

592 Agrawal, A. A., Hastings, A. P., Bradburd, G. S., Woods, E. C., Züst, T., Harvey, J.  
593 A. & Bukovinszky, T. (2015) Evolution of plant growth and defense in a  
594 continental introduction. *The American Naturalist*, 186(1), E1-E15.

595 Agrawal, A. A. & Karban, R. (1999) Why induced defenses may be favored over  
596 constitutive strategies in plants. *The ecology and evolution of inducible*  
597 *defenses* (eds R. Tollrian & C. D. Harvell), pp. 45-61. Princeton University  
598 Press, Princeton, New Jersey.

599 Agrawal, A. A. & Kotanen, P. M. (2003) Herbivores and the success of exotic plants:  
600 a phylogenetically controlled experiment. *Ecology Letters*, 6(8), 712-715.

- 601 Allen, W. J., Meyerson, L. A., Cummings, D., Anderson, J., Bhattarai, G. P. &  
602 Cronin, J. T. (2017) Biogeography of a plant invasion: drivers of latitudinal  
603 variation in enemy release. *Global Ecology and Biogeography*, 26(4), 435-  
604 446.
- 605 Allendorf, F. W. & Lundquist, L. L. (2003) Introduction: population biology,  
606 evolution, and control of invasive species. *Conservation Biology*, 17(1), 24-  
607 30.
- 608 Bassett, I. J. & Crompton, C. W. (1975) The biology of Canadian weeds. *Canadian*  
609 *Journal of Plant Science*, 55, 463-476.
- 610 Bassman, J. H. (2004) Ecosystem consequences of enhanced solar ultraviolet  
611 radiation: secondary plant metabolites as mediators of multiple trophic  
612 interactions in terrestrial plant communities. *Photochemistry and*  
613 *Photobiology*, 79(5), 382-398.
- 614 Beaton, L. L., Van Zandt, P. A., Esselman, E. J. & Knight, T. M. (2011) Comparison  
615 of the herbivore defense and competitive ability of ancestral and modern  
616 genotypes of an invasive plant, *Lespedeza cuneata*. *Oikos*, 120(9), 1413-1419.
- 617 Bhattacharya, A., Sood, P. & Citovsky, V. (2010) The roles of plant phenolics in  
618 defence and communication during *Agrobacterium* and *Rhizobium* infection.  
619 *Molecular Plant Pathology*, 11(5), 705-719.
- 620 Bixenmann, R. J., Coley, P. D., Weinhold, A. & Kursar, T. A. (2016) High herbivore  
621 pressure favors constitutive over induced defense. *Ecology and Evolution*,  
622 6(17), 6037-6049.
- 623 Blossey, B. & Notzold, R. (1995) Evolution of increased competitive ability in  
624 invasive nonindigenous plants: a hypothesis. *Journal of Ecology*, 83(5), 887-  
625 889.
- 626 Blumenthal, D. M. (2006) Interactions between resource availability and enemy  
627 release in plant invasion. *Ecology Letters*, 9(7), 887-895.
- 628 Bossdorf, O., Auge, H., Lafuma, L., Rogers, W. E., Siemann, E. & Prati, D. (2005)  
629 Phenotypic and genetic differentiation between native and introduced plant  
630 populations. *Oecologia*, 144(1), 1-11.
- 631 Brandes, D. & Nitzsche, J. (2006) Biology, introduction, dispersal and distribution of  
632 common ragweed (*Ambrosia artemisiifolia* L.) with special regard to  
633 Germany. *Nachrichtenblatt des Deutschen Pflanzenschutzdienstes*, 58, 286-  
634 291.

- 635 Campos-Vargas, R. & Saltveit, M. E. (2002) Involvement of putative chemical  
636 wound signals in the induction of phenolic metabolism in wounded lettuce.  
637 *Physiologia Plantarum*, 114(1), 73-84.
- 638 Cardarelli, E., Musacchio, A., Montagnani, C., Bogliani, G., Citterio, S. & Gentili, R.  
639 (2018) *Ambrosia artemisiifolia* control in agricultural areas: effect of  
640 grassland seeding and herbivory by the exotic leaf beetle *Ophraella communa*.  
641 *NeoBiota*, 38, 1.
- 642 Carrillo, J., Wang, Y., Ding, J., Klootwyk, K. & Siemann, E. (2012) Decreased  
643 indirect defense in the invasive tree, *Triadica sebifera*. *Plant Ecology*, 213(6),  
644 945-954.
- 645 Chapman, D. S., Haynes, T., Beal, S., Essl, F. & Bullock, J. M. (2014) Phenology  
646 predicts the native and invasive range limits of common ragweed. *Global*  
647 *Change Biology*, 20(1), 192-202.
- 648 Chauvel, B., Dessaint, F., Cardinal-Legrand, C. & Bretagnolle, F. (2006) The  
649 historical spread of *Ambrosia artemisiifolia* L. in France from herbarium  
650 records. *Journal of Biogeography*, 33(4), 665-673.
- 651 Chown, S. L., Hodgins, K. A., Griffin, P. C., Oakeshott, J. G., Byrne, M. &  
652 Hoffmann, A. A. (2014) Biological invasions, climate change and genomics.  
653 *Evolutionary Applications*, 8(1), 23-46.
- 654 Chun, Y. J., Fumanal, B., Laitung, B. & Bretagnolle, F. (2010) Gene flow and  
655 population admixture as the primary post-invasion processes in common  
656 ragweed (*Ambrosia artemisiifolia*) populations in France. *New Phytologist*,  
657 185(4), 1100-1107.
- 658 Cipollini, D. & Lieurance, D. M. (2012) Expression and costs of induced defense  
659 traits in *Alliaria petiolata*, a widespread invasive plant. *Basic and Applied*  
660 *Ecology*, 13(5), 432-440.
- 661 Cipollini, D., Mbagwu, J., Barto, K., Hillstrom, C. & Enright, S. (2005) Expression of  
662 constitutive and inducible chemical defenses in native and invasive  
663 populations of *Alliaria petiolata*. *Journal of Chemical Ecology*, 31(6), 1255-  
664 1267.
- 665 Colautti, R. I. & Barrett, S. C. (2013) Rapid adaptation to climate facilitates range  
666 expansion of an invasive plant. *Science*, 342(6156), 364-366.

- 667 Colautti, R. I. & Lau, J. A. (2015) Contemporary evolution during invasion: evidence  
668 for differentiation, natural selection, and local adaptation. *Molecular Ecology*,  
669 24(9), 1999-2017.
- 670 Colautti, R. I., Maron, J. L. & Barrett, S. C. H. (2009) Common garden comparisons  
671 of native and introduced plant populations: latitudinal clines can obscure  
672 evolutionary inferences. *Evolutionary Applications*, 2(2), 187-199.
- 673 Coley, P. D., Bryant, J. P. & Chapin, F. S. (1985) Resource availability and plant  
674 antiherbivore defense. *Science*, 230(4728), 895-899.
- 675 Colomer-Ventura, F., Martínez-Vilalta, J., Zuccarini, P., Escolà, A., Armengot, L. &  
676 Castells, E. (2015) Contemporary evolution of an invasive plant is associated  
677 with climate but not with herbivory. *Functional Ecology*, 29(11), 1475-1485.
- 678 Constabel, C. P. & Ryan, C. A. (1998) A survey of wound-and methyl jasmonate-  
679 induced leaf polyphenol oxidase in crop plants. *Phytochemistry*, 47(4), 507-  
680 511.
- 681 Cronin, J. T., Bhattarai, G. P., Allen, W. J. & Meyerson, L. A. (2015) Biogeography  
682 of a plant invasion: plant-herbivore interactions. *Ecology*, 96(4), 1115-1127.
- 683 Dalin, P., Ågren, J., Björkman, C., Huttunen, P. & Kärkkäinen, K. (2008) Leaf  
684 trichome formation and plant resistance to herbivory. *Induced plant resistance  
685 to herbivory* (ed A. Schaller), pp. 89-105. Springer.
- 686 De Rosario-Martinez, H. (2013) Phia: post-hoc interaction analysis. R package  
687 (version 0.1-3)
- 688 Dlugosch, K. M., Anderson, S. R., Braasch, J., Cang, F. A. & Gillette, H. D. (2015)  
689 The devil is in the details: genetic variation in introduced populations and its  
690 contributions to invasion. *Molecular Ecology*, 24(9), 2095-111.
- 691 Eigenbrode, S. D., Andreas, J. E., Cripps, M. G., Ding, H., Biggam, R. C. &  
692 Schwarzländer, M. (2008) Induced chemical defenses in invasive plants: a  
693 case study with *Cynoglossum officinale* L. *Biological Invasions*, 10(8), 1373-  
694 1379.
- 695 Endara, M. J. & Coley, P. D. (2011) The resource availability hypothesis revisited: A  
696 meta-analysis. *Functional Ecology*, 25(2), 389-398.
- 697 Essl, F., Biró, K., Brandes, D., Broennimann, O., Bullock, J. M., Chapman, D. S., . . .  
698 Guisan, A. (2015) Biological flora of the British Isles: *Ambrosia  
699 artemisiifolia*. *Journal of Ecology*, 103(4), 1069-1098.

- 700 Estoup, A., Ravigné, V., Hufbauer, R., Vitalis, R., Gautier, M. & Facon, B. (2016) Is  
701 There a Genetic Paradox of Biological Invasion? *Annual Review of Ecology,*  
702 *Evolution, and Systematics*, 47(1), 51-72.
- 703 Facon, B., Genton, B. J., Shykoff, J., Jarne, P., Estoup, A. & David, P. (2006) A  
704 general eco-evolutionary framework for understanding bioinvasions. *Trends in*  
705 *Ecology & Evolution*, 21(3), 130-135.
- 706 Felker-Quinn, E., Schweitzer, J. A. & Bailey, J. K. (2013) Meta-analysis reveals  
707 evolution in invasive plant species but little support for Evolution of Increased  
708 Competitive Ability (EICA). *Ecology and Evolution*, 3(3), 739-751.
- 709 Fortuna, T. M., Eckert, S., Harvey, J. A., Vet, L. E., Müller, C. & Gols, R. (2014)  
710 Variation in plant defences among populations of a range-expanding plant:  
711 consequences for trophic interactions. *New Phytologist*, 204(4), 989-999.
- 712 Franks, S. J., Pratt, P. D., Dray, F. A. & Simms, E. L. (2008) Selection on herbivory  
713 resistance and growth rate in an invasive plant. *The American Naturalist*,  
714 171(5), 678-691.
- 715 Fukano, Y. & Yahara, T. (2012) Changes in defense of an alien plant *Ambrosia*  
716 *artemisiifolia* before and after the invasion of a native specialist enemy  
717 *Ophraella communa*. *PloS One*, 7(11), e49114.
- 718 Gaudeul, M., Giraud, T., Kiss, L. & Shykoff, J. A. (2011) Nuclear and chloroplast  
719 microsatellites show multiple introductions in the worldwide invasion history  
720 of common ragweed, *Ambrosia artemisiifolia*. *PLoS One*, 6(3), e17658.
- 721 Genton, B. J., Kotanen, P. M., Cheptou, P. O., Adolphe, C. & Shykoff, J. A. (2005)  
722 Enemy release but no evolutionary loss of defence in a plant invasion: an  
723 inter-continental reciprocal transplant experiment. *Oecologia*, 146(3), 404-  
724 414.
- 725 Gerber, E., Schaffner, U., Gassmann, A., Hinz, H., Seier, M. &  
726 MÜLLER-SCHÄRER, H. (2011) Prospects for biological control of  
727 *Ambrosia artemisiifolia* in Europe: learning from the past. *Weed Research*,  
728 51(6), 559-573.
- 729 Gladieux, P., Giraud, T., Kiss, L., Genton, B. J., Jonot, O. & Shykoff, J. A. (2010)  
730 Distinct invasion sources of common ragweed (*Ambrosia artemisiifolia*) in  
731 Eastern and Western Europe. *Biological Invasions*, 13(4), 933-944.

- 732 Gu, X., Siemann, E., Zhu, L., Gao, S., Wang, Y. & Ding, J. (2014) Invasive plant  
733 population and herbivore identity affect latex induction. *Ecological*  
734 *Entomology*, 39(1), 1-9.
- 735 Hahn, P. G. & Maron, J. L. (2016) A framework for predicting intraspecific variation  
736 in plant defense. *Trends in Ecology & Evolution*, 31(8), 646-656.
- 737 Hauser, M.-T. (2014) Molecular basis of natural variation and environmental control  
738 of trichome patterning. *Frontiers in Plant Science*, 5, 320.
- 739 Heredia, J. B. & Cisneros-Zevallos, L. (2009) The effect of exogenous ethylene and  
740 methyl jasmonate on pal activity, phenolic profiles and antioxidant capacity of  
741 carrots (*Daucus carota*) under different wounding intensities. *Postharvest*  
742 *Biology and Technology*, 51(2), 242-249.
- 743 Hodgins, K. A., Bock, D. G. & Rieseberg, L. (2018) Trait Evolution in Invasive  
744 Species. *Annual Plant Reviews online*, 1, 1-37.
- 745 Hodgins, K. A. & Rieseberg, L. (2011) Genetic differentiation in life-history traits of  
746 introduced and native common ragweed (*Ambrosia artemisiifolia*)  
747 populations. *Journal of Evolutionary Biology*, 24(12), 2731-2749.
- 748 Ito, K. & Sakai, S. (2009) Optimal defense strategy against herbivory in plants:  
749 Conditions selecting for induced defense, constitutive defense, and no-  
750 defense. *Journal of Theoretical Biology*, 260(3), 453-459.
- 751 Joshi, J. & Vrieling, K. (2005) The enemy release and EICA hypothesis revisited:  
752 incorporating the fundamental difference between specialist and generalist  
753 herbivores. *Ecology Letters*, 8(7), 704-714.
- 754 Katabuchi, M. (2015) LeafArea: an R package for rapid digital image analysis of leaf  
755 area. *Ecological Research*, 30(6), 1073-1077.
- 756 Kazinczi, G., Béres, I., Novák, R., Bíró, K. & Pathy, Z. (2008) Common ragweed  
757 (*Ambrosia artemisiifolia*): a review with special regards to the results in  
758 Hungary. I. Taxonomy, origin and distribution, morphology, life cycle and  
759 reproduction strategy. *Herbologia*, 9(1), 55-91.
- 760 Keinänen, M., Oldham, N. J. & Baldwin, I. T. (2001) Rapid HPLC screening of  
761 jasmonate-induced increases in tobacco alkaloids, phenolics, and diterpene  
762 glycosides in *Nicotiana attenuata*. *Journal of agricultural and food chemistry*,  
763 49(8), 3553-3558.
- 764 Kessler, A. & Baldwin, I. T. (2002) Plant responses to insect herbivory: the emerging  
765 molecular analysis. *Annual Review of Plant Biology*, 53(1), 299-328.



- 766 Koricheva, J., Nykänen, H. & Gianoli, E. (2004) Meta-analysis of trade-offs among  
767 plant antiherbivore defenses: are plants jacks-of-all-trades, masters of all? The  
768 American Naturalist, 163(4), E64-E75.
- 769 Krishnamoorthy, K. & Lee, M. (2014) Improved tests for the equality of normal  
770 coefficients of variation. Computational Statistics, 29(1-2), 215-232.
- 771 Lande, R. (2015) Evolution of phenotypic plasticity in colonizing species. Molecular  
772 Ecology, 24(9), 2038-2045.
- 773 Lee, C. E. (2002) Evolutionary genetics of invasive species. Trends in Ecology and  
774 Evolution, 17(8), 386-391.
- 775 Lee, J., Vogt, T., Schmidt, J., Parthier, B. & Löbler, M. (1997) Methyljasmonate-  
776 induced accumulation of coumaroyl conjugates in barley leaf segments.  
777 Phytochemistry, 44(4), 589-592.
- 778 Li, Z.-H., Wang, Q., Ruan, X., Pan, C.-D. & Jiang, D.-A. (2010) Phenolics and plant  
779 allelopathy. Molecules, 15(12), 8933-8952.
- 780 Lommen, S. T. E., Hallmann, C. A., Jongejans, E., Chauvel, B., Leitsch-Vitalos, M.,  
781 Aleksanyan, A., . . . Müller-Schärer, H. (2017) Explaining variability in the  
782 production of seed and allergenic pollen by invasive *Ambrosia artemisiifolia*  
783 across Europe. Biological Invasions, 20(6), 1475-1491.
- 784 Macel, M., Dostálek, T., Esch, S., Bucharová, A., van Dam, N. M., Tielbörger, K., . . .  
785 Münzbergová, Z. (2017) Evolutionary responses to climate change in a range  
786 expanding plant. Oecologia, 184(2), 543-554.
- 787 Maron, J. L. & Vilà, M. (2001) When do herbivores affect plant invasion? Evidence  
788 for the natural enemies and biotic resistance hypotheses. Oikos, 95(3), 361-  
789 373.
- 790 Marwick, B. & Krishnamoorth, K. (2018) cvequality: Tests for the Equality of  
791 Coefficients of Variation from Multiple Groups. R package (version 0.1.3)
- 792 Moles, A. T., Bonser, S. P., Poore, A. G., Wallis, I. R. & Foley, W. J. (2011a)  
793 Assessing the evidence for latitudinal gradients in plant defence and  
794 herbivory. Functional Ecology, 25(2), 380-388.
- 795 Moles, A. T., Wallis, I. R., Foley, W. J., Warton, D. I., Stegen, J. C., Bisigato, A. J., . . .  
796 . Cornwell, W. K. (2011b) Putting plant resistance traits on the map: a test of  
797 the idea that plants are better defended at lower latitudes. New Phytologist,  
798 191(3), 777-788.

- 799 Moreira, X., Mooney, K. A., Rasmann, S., Petry, W. K., Carrillo-Gavilán, A., Zas, R.  
800 & Sampedro, L. (2014) Trade-offs between constitutive and induced defences  
801 drive geographical and climatic clines in pine chemical defences. *Ecology*  
802 *Letters*, 17(5), 537-546.
- 803 Morris, W. F., Traw, M. B. & Bergelson, J. (2006) On testing for a tradeoff between  
804 constitutive and induced resistance. *Oikos*, 112(1), 102-110.
- 805 Muller-Scharer, H., Schaffner, U. & Steinger, T. (2004) Evolution in invasive plants:  
806 implications for biological control. *Trends in Ecology & Evolution*, 19(8),  
807 417-422.
- 808 Müller-Schärer, H., Lommen, S. T., Rossinelli, M., Bonini, M., Boriani, M., Bosio,  
809 G. & Schaffner, U. (2014) *Ophraella communa*, the ragweed leaf beetle, has  
810 successfully landed in Europe: fortunate coincidence or threat? *Weed research*,  
811 54(2), 109-119.
- 812 Neilson, E. H., Goodger, J. Q., Woodrow, I. E. & Møller, B. L. (2013) Plant chemical  
813 defense: at what cost? *Trends in plant science*, 18(5), 250-258.
- 814 Orians, C. M. & Ward, D. (2010) Evolution of plant defenses in nonindigenous  
815 environments. *Annual Review of Entomology*, 55, 439-459.
- 816 Orrock, J. L., Sih, A., Ferrari, M. C., Karban, R., Preisser, E. L., Sheriff, M. J. &  
817 Thaler, J. S. (2015) Error management in plant allocation to herbivore defense.  
818 *Trends in Ecology & Evolution*, 30(8), 441-445.
- 819 Oswalt, M. L. & Marshall, G. D. (2008) Ragweed as an example of worldwide  
820 allergen expansion. *Allergy, Asthma and Clinical Immunology*, 4(3), 130-135.
- 821 Palmer, B. & McFadyen, R. C. (2012) *Ambrosia artemisiifolia* L. - annual ragweed.  
822 *Biological control of weeds in Australiapp.* 52-59. CSIRO, Collingwood.
- 823 Parker, J. D., Torchin, M. E., Hufbauer, R. A., Lemoine, N. P., Alba, C., Blumenthal,  
824 D. M., . . . Heckman, R. W. (2013) Do invasive species perform better in their  
825 new ranges? *Ecology*, 94(5), 985-994.
- 826 Poorter, H. & Remkes, C. (1990) Leaf area ratio and net assimilation rate of 24 wild  
827 species differing in relative growth rate. *Oecologia*, 83(4), 553-559.
- 828 Prentis, P. J., Wilson, J. R., Dormontt, E. E., Richardson, D. M. & Lowe, A. J. (2008)  
829 Adaptive evolution in invasive species. *Trends in Plant Sciences*, 13(6), 288-  
830 294.

- 831 R Core Team (2017) R: a language and environment for statistical computing.  
832 (version 3.4.3 "Kite-Eating Tree")
- 833 Rasmann, S. & Agrawal, A. A. (2011) Latitudinal patterns in plant defense: evolution  
834 of cardenolides, their toxicity and induction following herbivory. *Ecology*  
835 *Letters*, 14(5), 476-483.
- 836 Rasmann, S., Agrawal, A. A., Cook, S. C. & Erwin, A. C. (2009) Cardenolides,  
837 induced responses, and interactions between above- and belowground  
838 herbivores of milkweed (*Asclepias spp.*). *Ecology*, 90(9), 2393-2404.
- 839 Ricciardi, A. (2007) Are modern biological invasions an unprecedented form of  
840 global change? *Conservation Biology*, 21(2), 329-336.
- 841 Rius, M. & Darling, J. A. (2014) How important is intraspecific genetic admixture to  
842 the success of colonising populations? *Trends in Ecology & Evolution*, 29(4),  
843 233-242.
- 844 Sakihama, Y., Cohen, M. F., Grace, S. C. & Yamasaki, H. (2002) Plant phenolic  
845 antioxidant and prooxidant activities: phenolics-induced oxidative damage  
846 mediated by metals in plants. *Toxicology*, 177(1), 67-80.
- 847 Sax, D. F. & Brown, J. H. (2000) The paradox of invasion. *Global Ecology and*  
848 *Biogeography*, 9(5), 363-371.
- 849 Scheiner, S. M. (2001) Multiple response variables and multi-species interactions.  
850 *Design and analysis of ecological experiments*pp. 99-133. Chapman & Hall,  
851 New York.
- 852 Schrieber, K., Wolf, S., Wypior, C., Höhlig, D., Hensen, I. & Lachmuth, S. (2017)  
853 Adaptive and non-adaptive evolution of trait means and genetic trait  
854 correlations for herbivory resistance and performance in an invasive plant.  
855 *Oikos*, 126(4), 572-582.
- 856 Sun, Y., Brönnimann, O., Roderick, G. K., Poltavsky, A., Lommen, S. T. &  
857 Müller-Schärer, H. (2017) Climatic suitability ranking of biological control  
858 candidates: a biogeographic approach for ragweed management in Europe.  
859 *Ecosphere*, 8(4), e01731.
- 860 Taramarcaz, P., Lambelet, C., Clot, B., Keimer, C. & Hauser, C. (2005) Ragweed  
861 (*Ambrosia*) progression and its health risks: will Switzerland resist this  
862 invasion? *Swiss Medical Weekly*, 135(37-38), 538-548.

- 863 Thébaud & Simberloff (2001) Are plants really larger in their introduced ranges? The  
864 American Naturalist, 157(2), 231-236.
- 865 Throop, H. L. (2005) Nitrogen deposition and herbivory affect biomass production  
866 and allocation in an annual plant. Oikos, 111(1), 91-100.
- 867 Tian, D., Tooker, J., Peiffer, M., Chung, S. H. & Felton, G. W. (2012) Role of  
868 trichomes in defense against herbivores: comparison of herbivore response to  
869 woolly and hairless trichome mutants in tomato (*Solanum lycopersicum*).  
870 Planta, 236(4), 1053-1066.
- 871 Uesugi, A., Connallon, T., Kessler, A. & Monro, K. (2017) Relaxation of  
872 herbivore-mediated selection drives the evolution of genetic covariances  
873 between plant competitive and defense traits. Evolution, 71(6), 1700-1709.
- 874 Uesugi, A. & Kessler, A. (2016) Herbivore release drives parallel patterns of  
875 evolutionary divergence in invasive plant phenotypes. Journal of Ecology,  
876 104(3), 876-886.
- 877 van Boheemen, L. A., Atwater, D. Z. & Hodgins, K. A. (2018) Rapid and repeated  
878 local adaptation to climate in an invasive plant.  
879
- 880 van Boheemen, L. A., Lombaert, E., Nurkowski, K. A., Gauffre, B., Rieseberg, L. H.  
881 & Hodgins, K. A. (2017) Multiple introductions, admixture and bridgehead  
882 invasion characterize the introduction history of *Ambrosia artemisiifolia* in  
883 Europe and Australia. Molecular Ecology, 26(20), 5421-5434.
- 884 Van Noordwijk, A. J. & de Jong, G. (1986) Acquisition and allocation of resources:  
885 their influence on variation in life history tactics. The American Naturalist,  
886 128(1), 137-142.
- 887 Wang, Y., Carrillo, J., Siemann, E., Wheeler, G. S., Zhu, L., Gu, X. & Ding, J. (2013)  
888 Specificity of extrafloral nectar induction by herbivores differs among native  
889 and invasive populations of tallow tree. Annals of Botany, 112(4), 751-756.
- 890 Wang, Y., Siemann, E., Wheeler, G. S., Zhu, L., Gu, X. & Ding, J. (2012) Genetic  
891 variation in anti-herbivore chemical defences in an invasive plant. Journal of  
892 Ecology, 100(4), 894-904.
- 893 War, A. R., Kumar Taggar, G., Hussain, B., Sachdeva Taggar, M., Nair, R. M. &  
894 Sharma, H. C. (2018) Plant Defense Against Herbivory and Insect  
895 Adaptations. AoB Plants.

- 896 War, A. R., Paulraj, M. G., Ahmad, T., Buhroo, A. A., Hussain, B., Ignacimuthu, S. &  
897 Sharma, H. C. (2012) Mechanisms of plant defense against insect herbivores.  
898 Plant signaling & behavior, 7(10), 1306-1320.
- 899 WHO, W. H. O. (1998) Global solar UV index. *Global Solar UV Index*.  
900
- 901 Willemsen, R. W. (1975) Dormancy and germination of common ragweed seeds in  
902 the field. *American Journal of Botany*, 62(6), 639-643.
- 903 Woods, E. C., Hastings, A. P., Turley, N. E., Heard, S. B. & Agrawal, A. A. (2012)  
904 Adaptive geographical clines in the growth and defense of a native plant.  
905 *Ecological Monographs*, 82(2), 149-168.
- 906 Zandt, P. A. V. (2007) Plant defense, growth, and habitat: a comparative assessment  
907 of constitutive and induced resistance. *Ecology*, 88(8), 1984-1993.
- 908 Züst, T. & Agrawal, A. A. (2017) Trade-offs between plant growth and defense  
909 against insect herbivory: an emerging mechanistic synthesis. *Annual Review*  
910 *of Plant Biology*, 68, 513-534.  
911

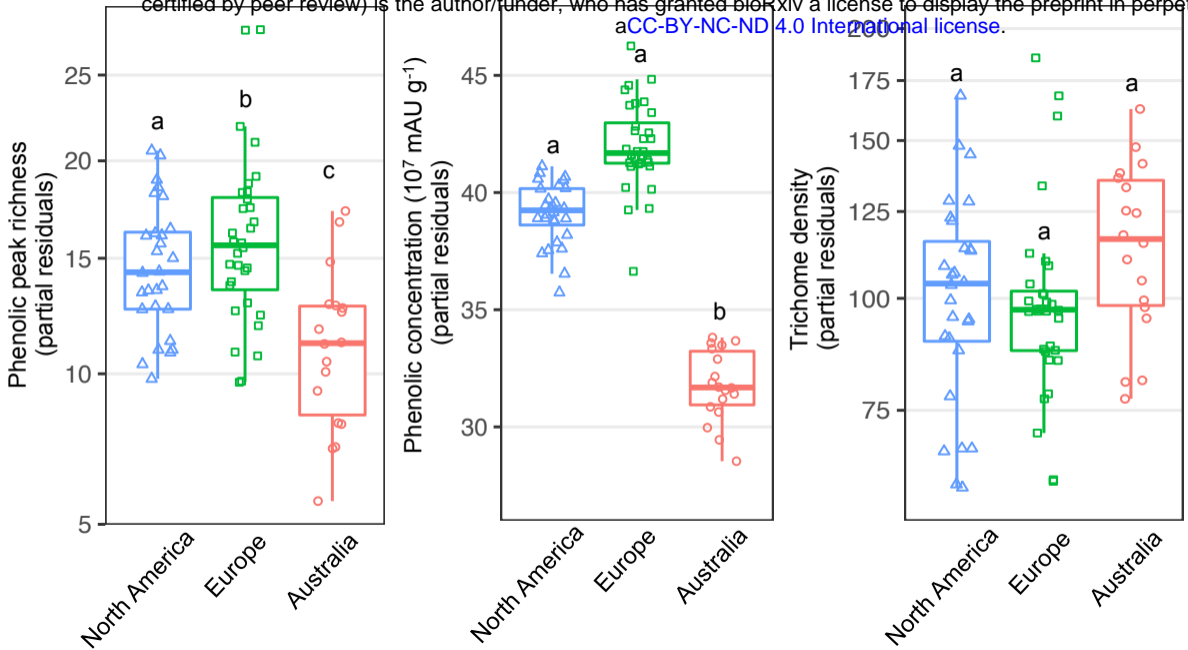

▲ North America    ■ Europe    ● Australia

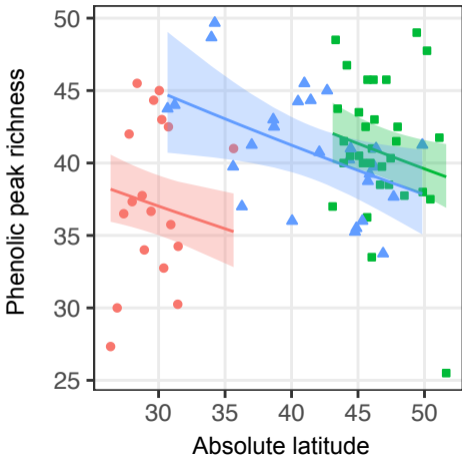

Phenolic peak richness  
(partial residuals)

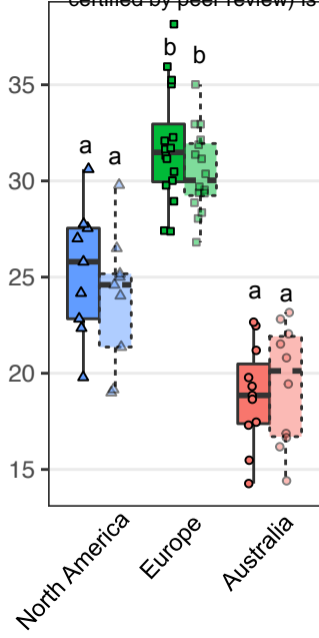

Phenolic concentration ( $10^3$  mAU  $g^{-1}$ )  
(partial residuals)

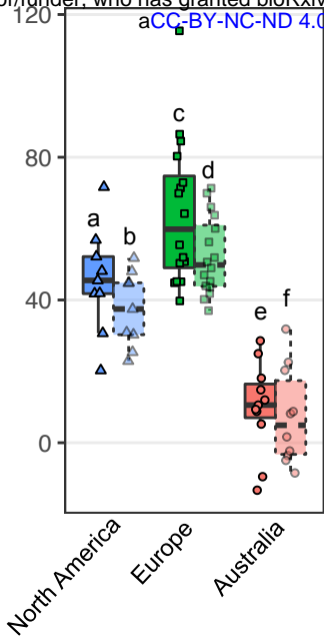



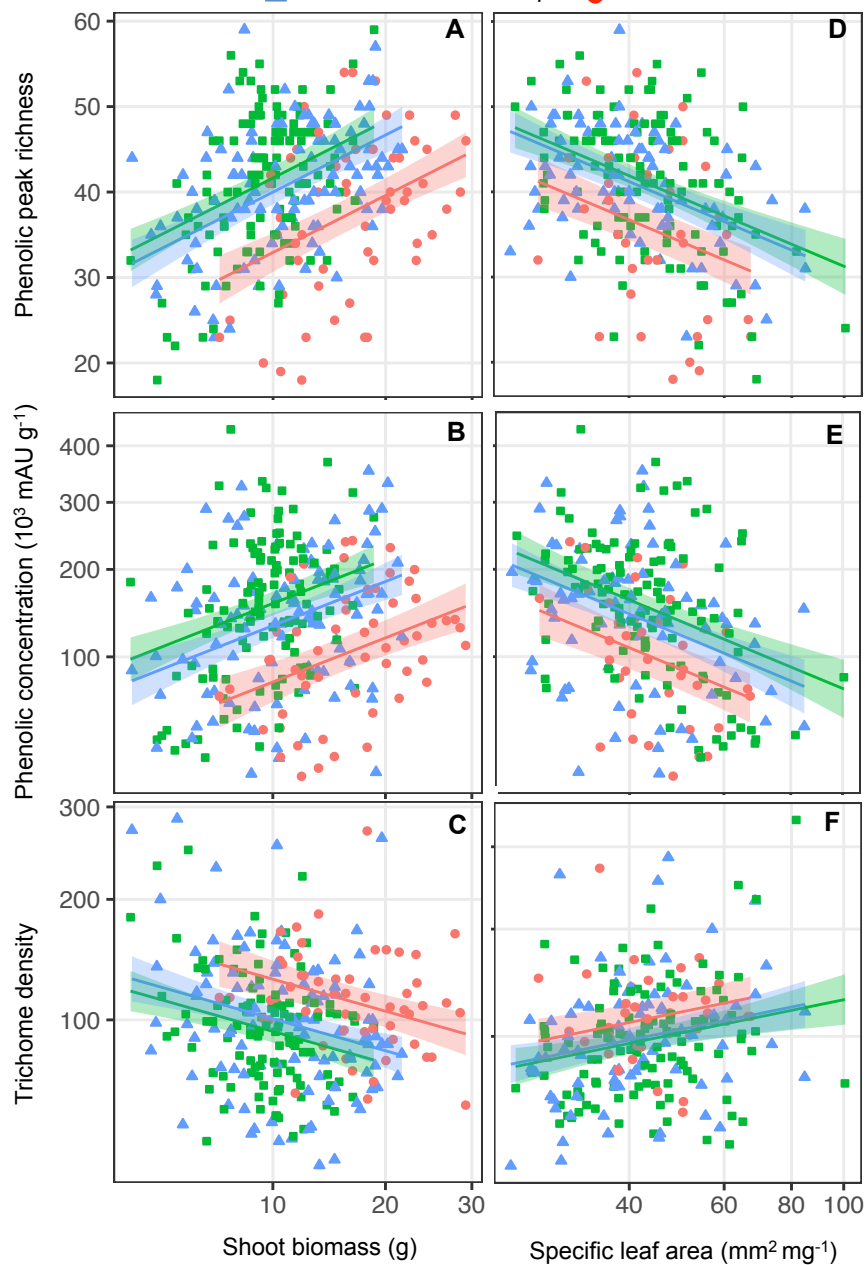

▲ North America ■ Europe ● Australia

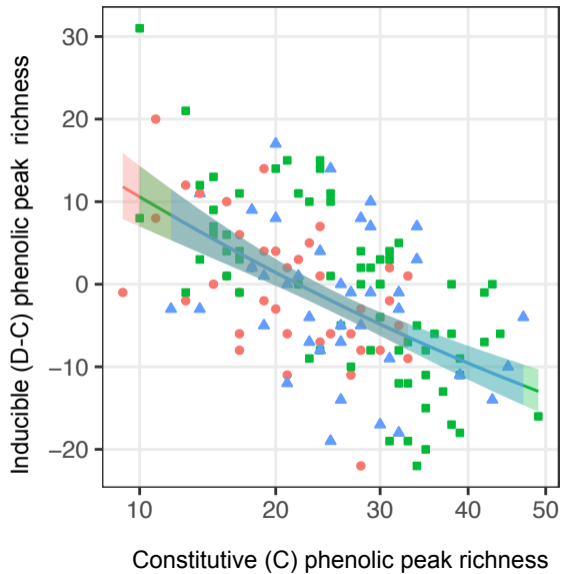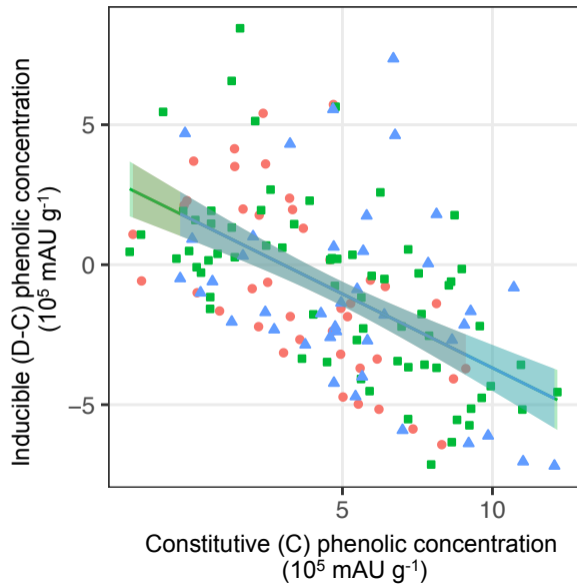

Source: https://www.biorxiv.org/content/10.1101/435271v1.full.pdf
